# Supplementary material for: Composition of PM Affects Acute Vascular Inflammatory and Coagulative Markers - The RAPTES Project
Source: PLoS One. 2013 Mar 13;8(3):e58944. doi: 10.1371/journal.pone.0058944 (PMC3596332; doi:10.1371/journal.pone.0058944)
Supplement: Table S14 — Two-pollutant models of associations between exposure to air pollution and percentage changes (25 h post-pre) in fibrinogen (outdoor sites). (DOC) [file pone.0058944.s015.doc]

**Table S14** Two-pollutant models of associations between exposure to air pollution and percentage changes (25h post-pre) in fibrinogen (outdoor sites).

|  | **IQR** | **A D J U S T M E N T P O L L U T A N T S** | | | | | | | | | | | | | | | | | | | | | | | | | |
| --- | --- | --- | --- | --- | --- | --- | --- | --- | --- | --- | --- | --- | --- | --- | --- | --- | --- | --- | --- | --- | --- | --- | --- | --- | --- | --- | --- |
| **PM10** | **PM2.5** | **PM2.5**-**10** | **PNC** | **Abs.a** | **EC (F)** | **EC (C)** | **OC (F)** | **OC (C)** | **Fe (tot)** | **Fe (sol)** | **Cu (tot)** | **Cu (sol)** | **Ni (tot)** | **Ni (sol)** | **V (tot)** | **V (sol)** | **End.** | **NO3- a** | **SO42- a** | **OPAA** | **OPGSH** | **OPTOTAL** | **O3** | **NO2** | **NOX** |
| **PM10** | 13.50 | 0.57 | -1.95 | 1.32* | 0.54 | 0.61 | 0.57 | 0.59 | 0.62 | 0.81 | 0.58 | 0.51 | 0.59 | 0.64 | 0.58 | 0.58 | 0.71* | 0.71* | 0.60 | -0.92 | 0.30 | 1.02 | 0.93 | 1.30 | 0.49 | 0.59 | 0.60 |
| **PM2.5** | 11.54 | 2.85 | 0.75 | 1.13* | 0.70 | 0.77 | 0.73 | 0.77* | 1.00 | 1.06* | 0.75* | 0.74 | 0.76* | 0.82* | 0.79* | 0.81* | 0.92** | 0.94** | 0.79 | -0.65 | 0.40 | 1.50 | 1.02* | 1.59* | 0.68 | 0.79 | 0.77 |
| **PM2.5**-**10** | 8.23 | -1.98 | -1.19 | 0.08 | 0.17 | 0.22 | 0.22 | 0.18 | 0.06 | -1.56 | 0.26 | -0.09 | 0.20 | 0.20 | -0.03 | 0.00 | 0.19 | 0.11 | 0.06 | -1.21 | 0.12 | -0.07 | 0.77 | 0.03 | -0.23 | -0.03 | 0.17 |
| **PNC** | 32,906 | -0.80 | -0.67 | -0.96 | -0.94 | -1.95 | -1.19 | -1.53 | -0.88 | -0.89 | -1.19 | -0.74 | -1.40 | -0.80 | -1.05 | -1.01 | -1.17 | -1.11 | -1.00 | -0.28 | -0.34 | -1.07 | -1.28 | -1.26 | -1.64 | -1.46 | -1.11 |
| **Absorbancea** | 3.49 | -0.99 | -0.92 | -0.86 | 1.37 | -0.80 | 3.67 | -0.44 | -0.90 | -0.74 | 0.72 | -0.15 | 0.39 | 0.83 | -0.83 | -0.79 | -0.74 | -0.75 | -0.84 | -0.59 | -0.41 | -1.27 | -0.86 | -1.37 | -2.56 | -2.60 | -1.23 |
| **EC (F)** | 4.35 | -1.23 | -1.07 | -1.33 | 0.39 | -5.32 | -1.27 | -1.96 | -1.24 | -1.12 | -0.19 | -0.65 | -0.86 | -0.39 | -1.32 | -1.23 | -1.51 | -1.42 | -1.42 | -0.63 | -0.61 | -1.70 | -1.69 | -1.89 | -2.77 | -2.88 | -2.07 |
| **EC (C)** | 0.40 | -1.10 | -0.88 | -1.18 | 0.82 | -0.67 | 0.67 | -1.12 | -0.88 | -0.92 | 0.35 | -0.20 | 0.25 | 0.31 | -1.06 | -0.90 | -1.97 | -1.59 | -1.24 | -0.80 | -1.31 | -1.64 | -1.50 | -1.87 | -3.26* | -2.62 | -1.54 |
| **OC (F)** | 1.82 | -0.18 | -0.72 | 0.46 | 0.36 | 0.54 | 0.44 | 0.55 | 0.45 | 0.57 | 0.53 | 0.38 | 0.52 | 0.68 | 0.62 | 0.57 | 1.30 | 1.33 | 0.46 | -0.52 | 0.07 | 0.69 | 0.99 | 0.87 | 0.46 | 0.39 | 0.48 |
| **OC (C)** | 0.79 | -0.32 | -0.42 | 1.28 | 0.41 | 0.48 | 0.43 | 0.48 | 0.48 | 0.52 | 0.47 | 0.38 | 0.48 | 0.48 | 0.50 | 0.48 | 0.63 | 0.59 | 0.67 | -0.37 | 0.39 | 0.67 | 1.30* | 0.91 | 0.50 | 0.52 | 0.51 |
| **Fe (tot)** | 895.10 | -0.80 | -0.65 | -0.90 | 0.11 | -1.26 | -0.74 | -1.00 | -0.74 | -0.76 | -0.84 | -0.45 | -1.15 | -0.45 | -0.80 | -0.76 | -0.89 | -0.86 | -0.99 | -0.35 | -0.26 | -0.78 | -0.85 | -0.90 | -1.21 | -1.20 | -0.93 |
| **Fe (sol)** | 32.09 | -0.65 | -0.33 | -1.24 | -0.49 | -1.12 | -0.83 | -1.12 | -0.99 | -0.90 | -0.72 | -1.22 | -0.91 | -0.73 | -1.17 | -1.24 | -1.33 | -1.33 | -1.43 | 0.24 | -0.16 | -0.67 | -1.13 | -0.93 | -1.56 | -1.39 | -1.21 |
| **Cu (tot)** | 57.96 | -1.13 | -0.95 | -1.23 | 0.46 | -1.51 | -0.48 | -1.34 | -1.00 | -1.06 | 0.48 | -0.40 | -1.17 | -0.30 | -1.13 | -1.06 | -1.31 | -1.26 | -1.38 | -0.54 | -0.31 | -1.13 | -1.21 | -1.31 | -1.91 | -1.82 | -1.36 |
| **Cu (sol)** | 8.65 | -1.29 | -1.23 | -1.18 | -0.36 | -1.79 | -0.86 | -1.33 | -1.15 | -1.04 | -0.62 | -0.63 | -0.90 | -1.13 | -1.08 | -1.02 | -0.98 | -1.04 | -1.18 | -0.89 | -0.75 | -0.92 | -0.75 | -1.10 | -1.87 | -2.13 | -1.45 |
| **Ni (tot)** | 3.53 | 0.08 | 0.09 | 0.13 | 0.02 | 0.07 | 0.04 | 0.02 | 0.08 | 0.04 | 0.04 | 0.05 | 0.02 | 0.05 | 0.13 | 0.10 | 0.21 | 0.16 | 0.13 | 0.19 | 0.33 | 0.33 | 0.27 | 0.34 | 0.24 | 0.14 | 0.11 |
| **Ni (sol)** | 1.82 | -0.19 | 0.10 | -0.72 | -0.16 | -0.55 | -0.31 | -0.37 | -0.23 | -0.49 | -0.27 | 0.02 | -0.22 | -0.33 | -0.65 | -0.71 | -2.69** | -2.92* | -0.75 | 0.38 | 0.03 | -1.23 | -1.58 | -1.42 | -0.77 | -0.76 | -0.63 |
| **V (tot) b** | 2.04 | 1.29** | 1.32** | 1.15* | 1.17* | 1.10* | 1.16* | 1.38** | 1.49** | 1.22** | 1.16* | 1.17* | 1.17* | 1.08* | 1.21* | 1.98** | 1.13* | 7.38** | 1.18* | 1.16* | 0.71 | -0.86 | -0.65 | -0.87 | 1.06* | 1.11* | 1.18* |
| **V (sol) b** | 1.94 | 1.10 | 1.19 | 0.82 | 0.85 | 0.75 | 0.84 | 1.02 | 1.39* | 0.91 | 0.84 | 0.89 | 0.87 | 0.76 | 0.86 | 2.16** | -7.14** | 0.82 | 0.84 | 1.05 | 0.60 | -1.60 | -1.70 | -1.70 | 0.79 | 0.80 | 0.85 |
| **Endotoxin** | 0.19 | 0.00 | 0.00 | 0.00 | 0.00 | 0.00 | 0.00 | 0.00 | 0.00 | -0.01 | -0.01 | -0.01 | -0.01 | 0.00 | 0.00 | 0.00 | 0.01 | 0.00 | 0.00 | 0.00 | 0.00 | 0.01 | 0.01 | 0.00 | 0.01 | 0.00 | 0.00 |
| **NO3- a** | 5.19 | 1.93* | 1.64 | 1.35** | 0.95* | 0.98* | 0.95* | 1.00** | 1.14* | 1.24** | 0.97** | 1.08** | 0.98** | 0.99** | 1.06** | 1.09** | 1.04** | 1.10** | 1.02* | 1.00* | 0.44 | 2.13** | 1.20* | 1.85** | 0.93* | 1.03* | 1.00* |
| **SO42- a** | 2.99 | 1.38* | 1.31* | 1.50** | 1.45** | 1.47** | 1.45** | 1.59** | 1.49** | 1.52** | 1.51** | 1.53** | 1.52** | 1.50** | 1.72** | 1.56** | 1.38** | 1.51** | 1.50** | 1.16 | 1.50** | 1.27 | 1.35* | 1.32* | 1.44** | 1.49** | 1.49** |
| **OPAA** | 19.08 | -0.60 | -1.12 | 0.69 | 0.70 | 0.85 | 0.76 | 0.93 | 0.32 | 0.34 | 0.79 | 0.65 | 0.80 | 0.87 | 0.88 | 0.59 | 0.85 | 0.74 | 0.65 | -1.57 | 0.15 | 0.66 | 0.86 | 1.75 | 0.55 | 0.91 | 0.85 |
| **OPGSH** | 15.53 | -1.21 | -1.08 | -0.54 | 0.55 | 0.24 | 0.41 | 0.41 | -0.01 | -1.42 | 0.29 | 0.03 | 0.27 | 0.22 | 0.09 | 0.16 | 0.03 | 0.14 | -0.35 | -0.84 | -0.31 | -0.71 | -0.06 | -1.40 | -0.36 | -0.12 | 0.12 |
| **OPTOTAL** | 38.71 | -1.71 | -2.03 | 0.75 | 1.04 | 1.18 | 1.09 | 1.33 | 0.27 | -0.18 | 1.06 | 0.71 | 1.06 | 1.18 | 1.10 | 0.71 | 1.04 | 0.93 | 0.71 | -1.97 | 0.04 | -1.76 | 1.76 | 0.77 | 0.54 | 1.02 | 1.09 |
| **O3** | 9.74 | -1.12 | -1.09 | -1.70 | -2.57 | -3.53* | -3.04 | -3.54* | -1.58 | -1.40 | -2.16 | -1.90 | -2.35 | -2.46 | -1.84 | -1.52 | -1.13 | -1.42 | -1.69 | -0.69 | -0.48 | -0.69 | -1.38 | -0.86 | -1.58 | -3.11 | -5.15* |
| **NO2** | 10.54 | -0.17 | -0.28 | 0.50 | 1.37 | 2.54 | 2.15 | 2.00 | 0.29 | 0.49 | 1.31 | 0.85 | 1.42 | 1.93 | 0.62 | 0.61 | 0.27 | 0.49 | 0.58 | -0.25 | 0.15 | -0.88 | 0.23 | -0.58 | -1.58 | 0.49 | 7.81* |
| **NOX** | 28.05 | -0.60 | -0.54 | -0.44 | 0.31 | 0.48 | 0.77 | 0.40 | -0.44 | -0.36 | 0.21 | -0.03 | 0.27 | 0.45 | -0.38 | -0.31 | -0.68 | -0.56 | -0.38 | -0.43 | -0.29 | -1.06 | -0.65 | -1.02 | -3.25* | -6.21* | -0.40 |

For explanation see Table S9.
